# Supplementary material for: Longitudinal resting-state EEG-based modeling predicts phenoconversion and delineates heterogeneity in isolated REM sleep behavior disorder
Source: Research Square preprint supplement (doi:10.21203/rs.3.rs-9140218/v1), 2026-03-26
Supplement: Supplementary file 1 [file 724bcffd7da2a8e6c8580a30.docx]

**Table S1. Clinical characteristics of subtype 1 and subtype 2 in non-converted RBD patients.**

Group differences were assessed using two-sample t-tests, with positive t-values indicating higher values in subtype 2 compared with subtype 1. Among the examined variables, age at RBD onset showed a trend toward a difference between subtypes, whereas no other clinical characteristics differed significantly between the two subtypes.

|  | Subtype 1 | Subtype 2 | *T-value (2>1)* | *P-value* |
| --- | --- | --- | --- | --- |
| Age | 68.00 ± 6.51 | 69.47 ± 6.19 | -1.27509 | 0.261 |
| MDS-UPDRS-III | 1.02 ± 2.10 | 1.00 ± 1.99 | 0.103107 | 0.961 |
| KVSS | 1.56 ± 3.35 | 1.68 ± 3.94 | -0.13987 | 0.889 |
| MMSE | 28.30 ± 1.61 | 28.09 ± 1.31 | 0.888213 | 0.522 |
| MoCA | 26.65 ± 2.64 | 25.70 ± 2.48 | 1.738063 | 0.087 |
| RBDQ-KR | 43.86 ± 19.24 | 38.86 ± 18.72 | 1.15127 | 0.211 |
| ESS | 4.61 ± 3.32 | 6.14 ± 4.65 | -1.88979 | 0.078 |
| GDS | 8.48 ± 6.64 | 9.05 ± 5.51 | -0.5595 | 0.654 |
| PSQI | 7.45 ± 4.39 | 7.72 ± 4.47 | -0.35308 | 0.770 |
| SCOPA-AUT | 13.36 ± 8.65 | 14.49 ± 7.40 | -0.62184 | 0.500 |
| RBD duration, yr | 6.92 ± 8.25 | 5.51 ± 4.19 | 1.06 | 0.291 |
| Age at RBD onset, yr | 61.14 ± 8.04 | 63.96 ± 6.33 | -1.91 | 0.060 |


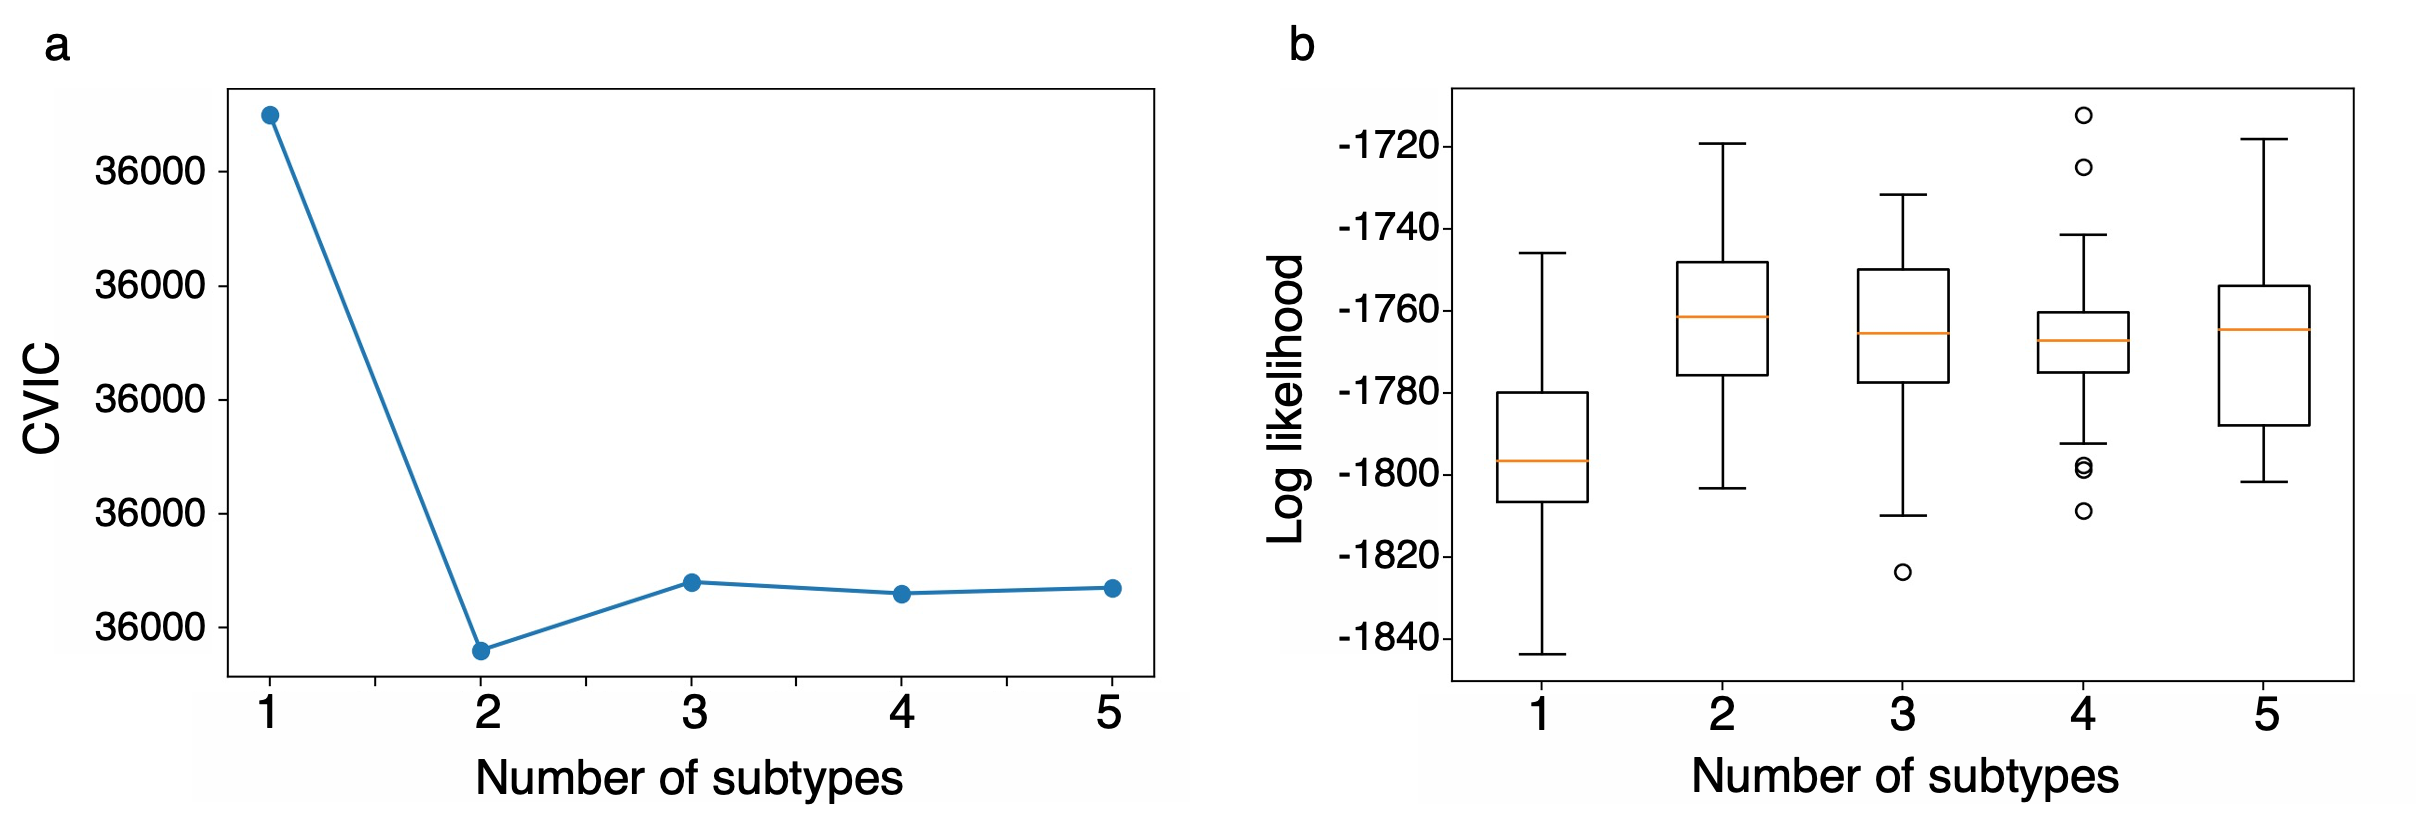


**Figure S1. SuStaIn model selection criteria.**
**a.** The Cross-Validation Information Criterion (CVIC) showed a sharp decrease from one to two subtypes, indicating a substantial improvement in model fit when introducing a second subtype. In contrast, increasing the number of subtypes beyond two resulted in only minor fluctuations in CVIC, with a slight increase at three subtypes and nearly flat values thereafter, suggesting minimal additional benefit from more complex models.
**b.** Consistent with the CVIC results, test set log-likelihood increased markedly from one to two subtypes but exhibited only marginal changes from two to five subtypes, indicating that additional subtypes provided little improvement in model fit.


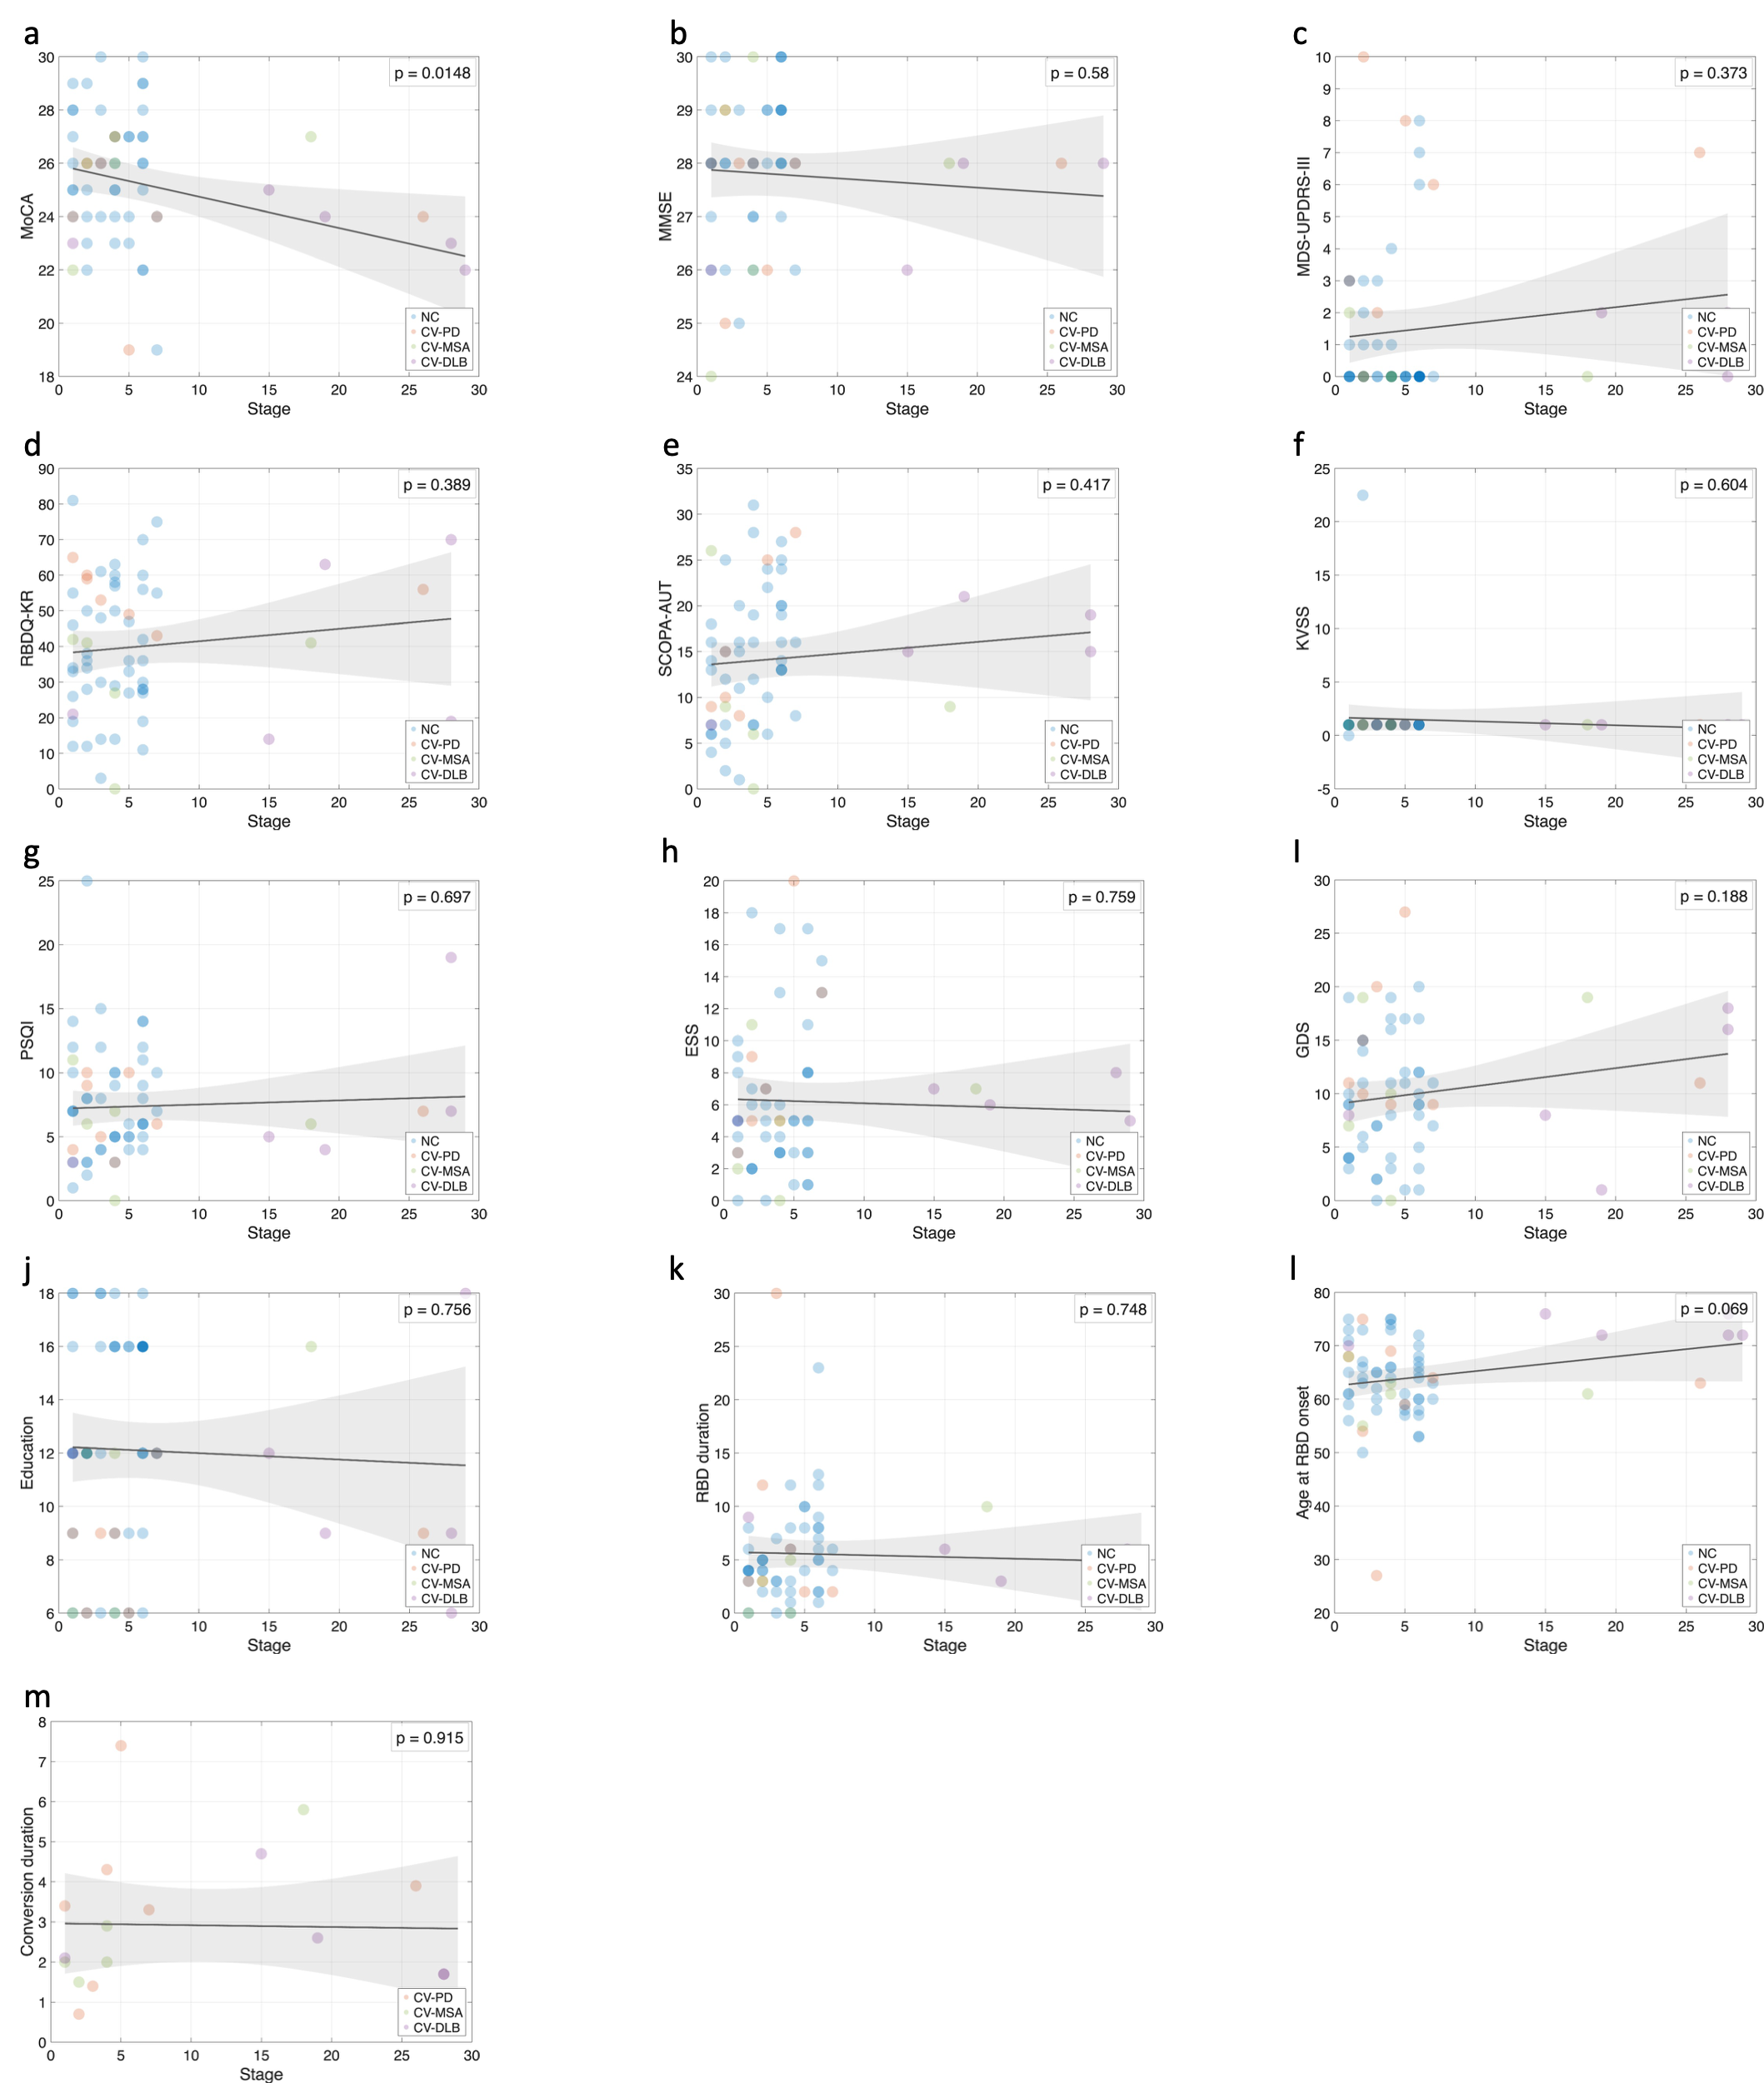


**Figure S2. Associations between SuStaIn stage and neurophysiological scores and clinical characteristics in subtype 2.**
Scatter plots illustrate the relationships between SuStaIn stage and multiple neurophysiological scores and clinical characteristics within subtype 2. Each point represents an individual subject, color-coded by diagnostic group (NC, CV-PD, CV-MSA, and CV-DLB). Solid lines indicate linear regression fits with shaded areas representing 95% confidence intervals, and regression p-values are shown in each panel. With the exception of MoCA, SuStaIn stage did not show significant associations with any neurophysiological scores or clinical characteristics
